# Supplementary material
Source: PubMed Central journal article supplement (PMC4793426)

Confounder–outcome RR required to produce  
observed treatment effect

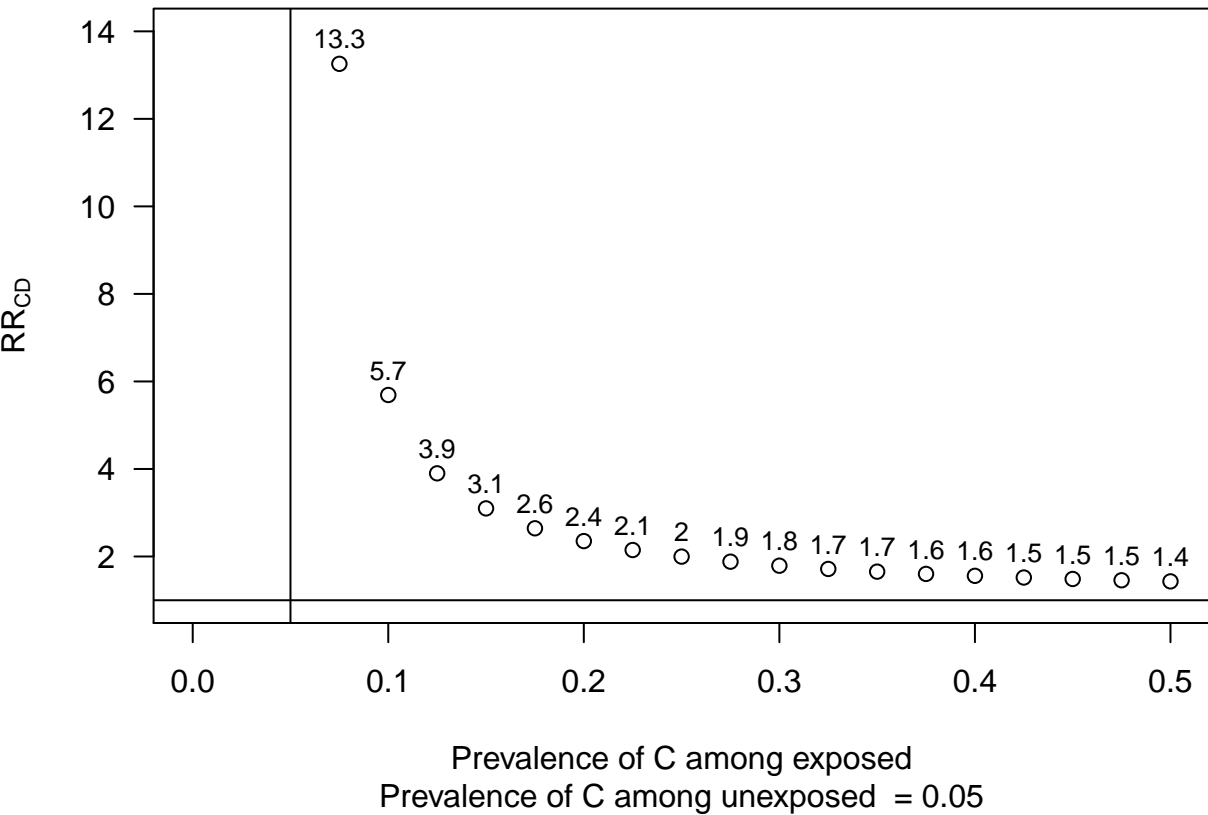

Supplement: batb011481.ww1_default.pdf [file batb011481.ww1_default.pdf]
